# Supplementary material for: If You Grow It, They Will Come: Ornamental Plants Impact the Abundance and Diversity of Pollinators and Other Flower-Visiting Insects in Gardens
Source: MDPI journal article supplement (doi:10.3390/horticulturae8111068), 2022-11-14
Supplement: s1 [file s1]

Archive with 1 entries (1 files):
- horticulturae-1964852-supplementary.pdf
