# Supplementary material for: If You Grow It, They Will Come: Ornamental Plants Impact the Abundance and Diversity of Pollinators and Other Flower-Visiting Insects in Gardens
Source: MDPI journal article supplement (doi:10.3390/horticulturae8111068), 2022-11-14
Supplement: s1 [file s1 › horticulturae-1964852-supplementary.pdf]

| Common Name       | Scientific Name                         | Cultivar             | Key               |
|-------------------|-----------------------------------------|----------------------|-------------------|
| Joe-Pye weed      | <i>Eupatorium dubium</i>                | 'Baby Joe'           | Baby Joe Pyeweed  |
| bee balm          | <i>Monarda didyma</i>                   | 'Jacob Cline'        | Bee Balm          |
| begonia           | <i>Begonia x semperflorens cultorum</i> | 'Bada Bing' ®        | Begonia           |
| begonia           | <i>Begonia</i> sp.                      | 'Rose'               | Begonia           |
| black-eyed Susan  | <i>Rudbeckia fulgida</i>                | var. <i>deamii</i>   | Black-Eyed Susan  |
| blanket flower    | <i>Gaillardia x grandiflora</i>         | 'Goblin (Kobold)'    | Blanket Flower    |
| bluebeard         | <i>Caryopteris x clandonensis</i>       | 'Longwood Blue'      | Bluebeard         |
| brown-eyed Susan  | <i>Rudbeckia triloba</i>                | 'Prairie Glow'       | Brown-Eyed Susan  |
| catmint           | <i>Nepeta x faassenii</i>               | 'Junior Walker'™     | Catmint           |
| dahlia            | <i>Dahlia x hybrida</i>                 | 'Happy Single Wink'  | Dahlia            |
| daylily           | <i>Hemerocallis</i> sp.                 | 'Fragrant Returns'   | Day Lillies       |
| dwarf goldenrod   | <i>Solidago</i> sp.                     | 'Little Lemon'       | Dwarf Goldenrod   |
| Helen's flower    | <i>Helenium</i> sp.                     | 'Helbro'             | Helen's Flowers   |
| lantana           | <i>Lantana camara</i>                   | 'Dallas Red'         | Lantana           |
| lavender          | <i>Lavender x intermedia</i>            | 'Phenomenal'         | Lavender          |
| New England aster | <i>Symphyotrichum novae-angliae</i>     |                      | New England Aster |
| petunia           | <i>Petunia</i> sp.                      | 'Bee's Knees Yellow' | Petunias          |
| pineapple sage    | <i>Salvia elegans</i>                   |                      | Pineapple Sage    |
| purple coneflower | <i>Echinacea purpurea</i>               | 'Magnus'             | Purple Coneflower |
| Russian sage      | <i>Salvia yangii</i>                    |                      | Russian Sage      |
| sedum             | <i>Sedum</i> sp.                        | 'Autumn Joy'         | Sedum             |
| tickseed          | <i>Coreopsis verticillata</i>           | 'Zagreb'             | Tickseed          |
| verbena           | <i>Verbena bonariensis</i>              |                      | Verbena           |
| veronia           | <i>Veronia lettermannii</i>             | 'Iron Butterfly'     | Veronia           |
| yarrow            | <i>Achillea millefolium</i>             | 'Paprika'            | Yarrow            |
| zinnia            | <i>Zinnia</i> sp.                       | 'Double Zahara'™     | Zinnias           |

Figure S1. Plant Varieties Information.
